# Supplementary material for: Hierarchical materials synthesis at soft all-aqueous interfaces
Source: Royal Society of Chemistry journal article supplement (doi:10.1039/c2sm07373k), 2012-01-01
Supplement: c2sm07373k.pdf [file c2sm07373k.pdf]

## Electronic Supporting Information

### Hierarchical Materials Synthesis at Soft All-Aqueous Interfaces

Su Hui Sophia Lee,<sup>a</sup> M. K. Dawood,<sup>b</sup> W. K. Choi,<sup>b,c</sup> T. Alan Hatton,<sup>a,d</sup> and Saif A. Khan<sup>a,c\*</sup>

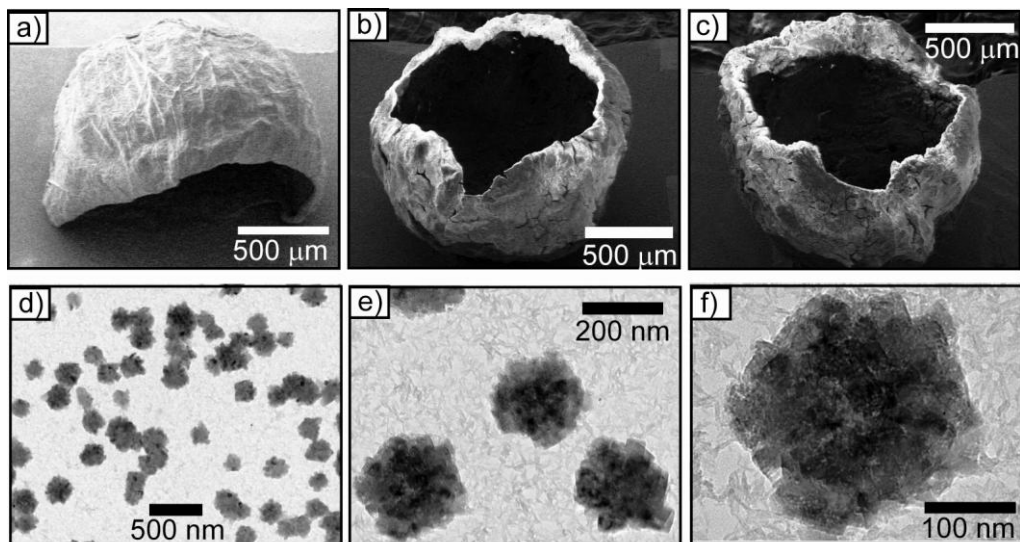

5 **Fig. S1.** a-c) SEM images of HSSP (level 3 structures) (PAA concentration = 7.7 mM). d-f) TEM images of HSSP (level 2 structures) (PAA concentration = 7.7 mM).

#### Viscosity measurements

10 The viscosity of various PAA and PAA with  $\text{NH}_4\text{OH}$  solutions was determined using a U-tube viscometer (PSL,BS/U).

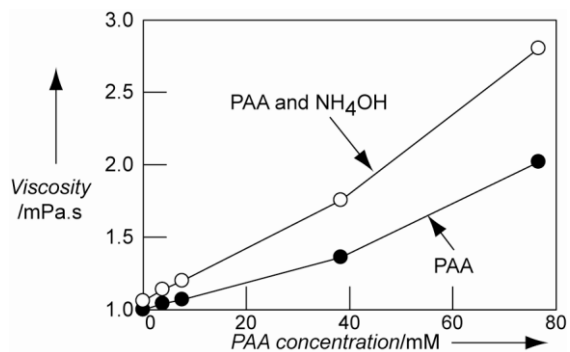

15 **Fig. S2.** Viscosity profile of PAA, and PAA with  $\text{NH}_4\text{OH}$  mixture.
